# Supplementary material for: Fracture healing in a polytrauma rat model is influenced by mtDNA:cGAS complex mediated pro‐inflammation
Source: Springer Nature journal article supplement (doi:10.1186/s40634-023-00637-5), 2023-01-01
Supplement: MOESM2 [file 40634_2023_637_MOESM2_ESM.pdf]

|                  | Vehicle     | RU.521      |
|------------------|-------------|-------------|
| Group 1 (n)      | 5           | 5           |
| Survived         | 4           | 4           |
| Died             | 1           | 1           |
| Group 2 (n)      | 2           | 7           |
| Survived         | 1           | 5           |
| Died             | 1           | 3           |
| Total (n)        | 7           | 12          |
| Survived         | 5           | 8           |
| Died             | 2           | 4           |
| <b>Group 1 %</b> | <b>20.0</b> | <b>20.0</b> |
| <b>Group 2 %</b> | <b>50.0</b> | <b>42.9</b> |
| <b>Total %</b>   | <b>28.6</b> | <b>33.3</b> |
